# Supplementary material for: Tailorable boron-doped carbon nanotubes as high-efficiency counter electrodes for quantum dot sensitized solar cells
Source: Royal Society of Chemistry journal article supplement (doi:10.1039/d0cy02266g), 2021-01-01
Supplement: d0cy02266g1.pdf [file d0cy02266g1.pdf]

## Supplementary materials

### Tailorable boron-doping carbon nanotubes as high-efficiency counter electrodes for quantum dot sensitized solar cells

Wenhua Li, Shule Zhang, Qianqiao Chen\*, Qin Zhong\*

\* Corresponding author: Nanjing University of Science and Technology, Nanjing,  
People's Republic of China, 210094

E-mail: cqg@njust.edu.cn (Qianqiao Chen); zq304@njust.edu.cn (Qin Zhong)

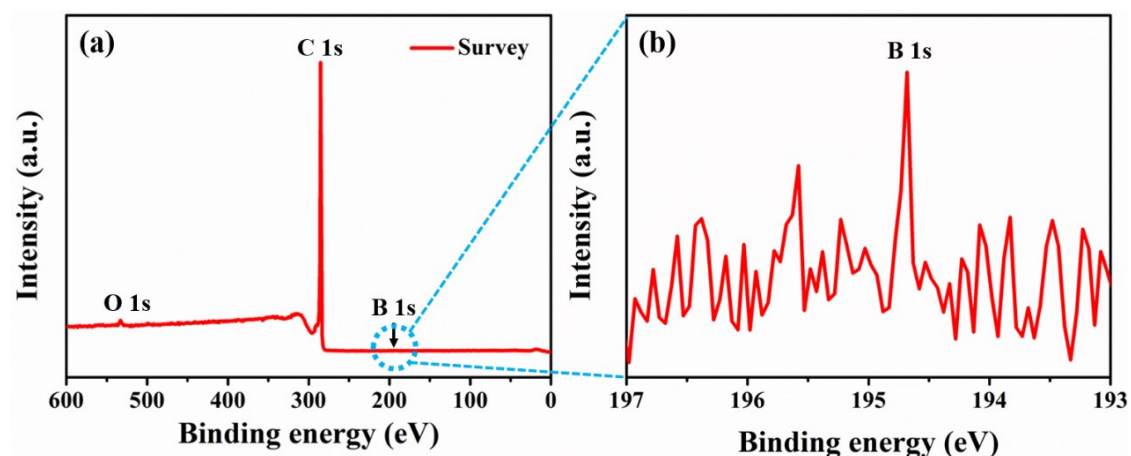

**Figure S1** (a) XPS survey spectrum of BCNT1 and (b) high-resolution XPS spectrum of B 1s.

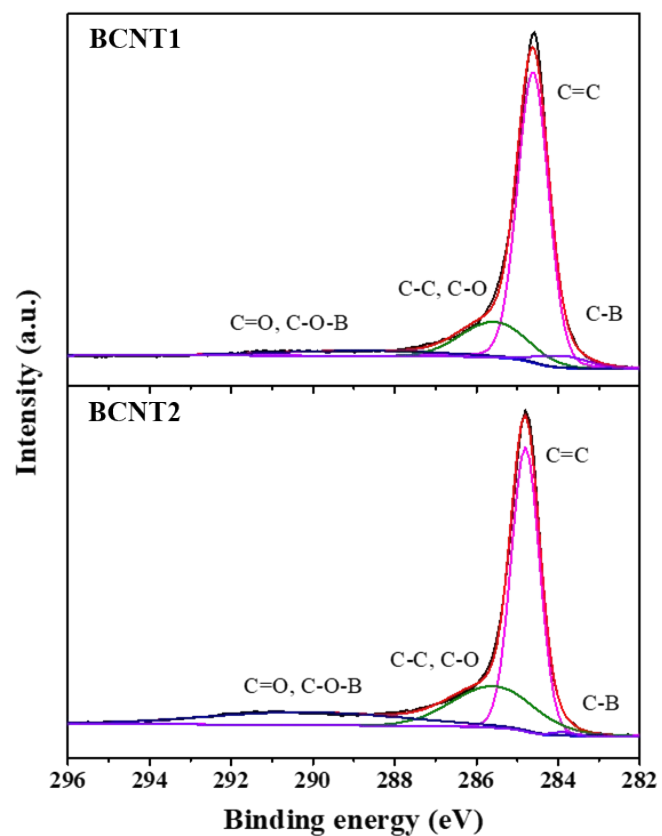

**Figure S2** High-resolution C1s spectra of BCNT1 and BCNT2.

**Table S1** C species content calculated based on XPS spectrum area.

| Samples    | BCNT1 | BCNT2 |
|------------|-------|-------|
| C=C        | 0.710 | 0.574 |
| C-C, C-O   | 0.177 | 0.240 |
| C-B        | 0.045 | 0.005 |
| C=O, C-O-B | 0.068 | 0.181 |

**Table S2** Comparison of photoelectrochemical performances of CdS/CdSe/ZnS co-sensitized QDSSCs with different counter electrodes, and the EIS results ( $R_{ct}$ ) for the symmetrical dummy cells.

| CEs                                                         | $J_{sc}$ (mA $\cdot$ cm <sup>-2</sup> ) | $V_{oc}$ (V) | FF   | PCE (%) | Active Area (cm <sup>2</sup> ) | $R_{ct}$ ( $\Omega \cdot$ cm <sup>2</sup> ) | Refs         |
|-------------------------------------------------------------|-----------------------------------------|--------------|------|---------|--------------------------------|---------------------------------------------|--------------|
| BCNT1                                                       | 17.40                                   | 0.52         | 0.52 | 4.55    | 0.16                           | 0.35                                        | Present work |
| Iron sulfide/carbon                                         | 19.57                                   | 0.45         | 0.64 | 5.61    | -                              | 2.86                                        | 1            |
| CB/Cu <sub>x</sub> S-3                                      | 16.55                                   | 0.58         | 0.57 | 5.50    | 0.16                           | 3.35                                        | 2            |
| Double-shelled Cu <sub>2-x</sub> Se nanocages               | 16.42                                   | 0.67         | 0.43 | 4.76    | 0.20                           | 2.94                                        | 3            |
| CoS/NC-30                                                   | 14.68                                   | 0.55         | 0.55 | 4.46    | 0.25                           | 14.47                                       | 4            |
| DW-Cu <sub>2-x</sub> Se/Cu <sub>7</sub> S <sub>4</sub> -HNB | 23.02                                   | 0.52         | 0.36 | 4.38    | 0.16                           | 7.10                                        | 5            |
| CuS2h                                                       | 15.52                                   | 0.61         | 0.45 | 4.29    | 0.27                           | 1.18                                        | 6            |
| PACuS4                                                      | 13.35                                   | 0.59         | 0.53 | 4.20    | -                              | -                                           | 7            |
| Cu <sub>3</sub> Se <sub>2</sub> -2h                         | 11.52                                   | 0.56         | 0.62 | 3.99    | 0.13                           | -                                           | 8            |
| CoS                                                         | 11.62                                   | 0.60         | 0.53 | 3.67    | 0.25                           | 6.45                                        | 9            |
| PbS                                                         | 15.11                                   | 0.57         | 0.41 | 3.49    | 0.20                           | 352.80                                      | 10           |
| NiS120                                                      | 11.67                                   | 0.60         | 0.47 | 3.25    | 0.27                           | 7.96                                        | 11           |
| ClSe-20min                                                  | 14.74                                   | 0.55         | 0.36 | 2.92    | 0.20                           | 440                                         | 12           |
| Cu <sub>2</sub> S                                           | 6.89                                    | 0.57         | 0.25 | 1.01    | 0.16                           | -                                           | 13           |

## References

1. H. Geng, L. Zhu, W. Li and H. Liu, *Sol. Energy*, 2017, **147**, 61-67.
2. I. P. Liu, H. Teng and Y.-L. Lee, *J. Mater. Chem. A*, 2017, **5**, 23146-23157.
3. Z. Hu, R. Zhou, W. Sun, J. Zhang, C.-S. Lee and J. Xu, *Mater. Today Energy*, 2017, **5**, 331-337.
4. W. Yang, Y. Sun, P. Yang and X. Chen, *J. Nanomater.*, 2019, **2019**, 1-8.
5. L. Ran and L. Yin, *CrystEngComm*, 2017, **19**, 5640-5652.
6. H.-J. Kim, B. Ko, C. V. V. M. Gopi, M. Venkata-Haritha and Y.-S. Lee, *J. Electroanal. Chem.*, 2017, **791**, 95-102.
7. M. Panthakkal Abdul Muthalif, C. D. Sunesh and Y. Choe, *Appl. Surf. Sci.*, 2018, **440**, 1022-1026.
8. H. Bai, T. Shen, S. Wang, B. Li, G. Cao and J. Tian, *Sci. China Mater.*, 2017, **60**, 637-645.
9. A. E. Reddy, S. S. Rao, C. V. V. M. Gopi, T. Anitha, C. V. Thulasi-Varma, D. Punnoose and H.-J. Kim, *Chem. Phys. Lett.*, 2017, **687**, 238-243.
10. Y. Wang, Y. Huang, H. Li, Y. Zhou, L. Wan, H. Niu, Y. Li, J. Xu and R. Zhou, *IEEE J. Photovolt.*, 2018, **8**, 1670-1676.
11. Y.-S. Lee, C. V. V. M. Gopi, M. Venkata-Haritha, S. S. Rao and H.-J. Kim, *J. Photoch. Photobio. A*, 2017, **332**, 200-207.
12. H. Guo, R. Zhou, Y. Huang, L. Wan, W. Gan, H. Niu and J. Xu, *Ceram. Int.*, 2018, **44**, 16092-16098.
13. E. Wu, J. Jin, S. Liu, D. Li, S. Gao, F. Deng, X. Yan, Y. Xiong and H. Tang, *Sci. Rep.*, 2019, **9**, 12337.
